# Supplementary material
Source: PubMed Central journal article supplement (PMC365703)

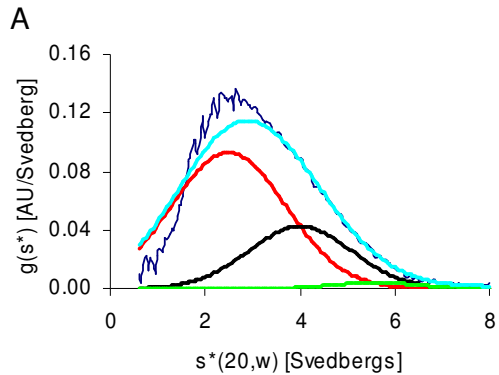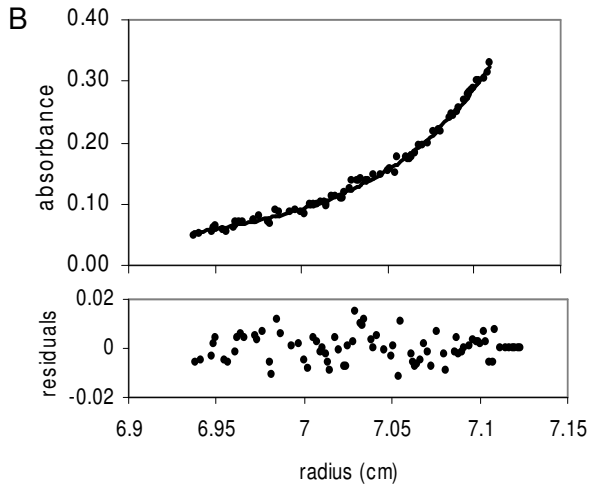

Supplement: pnas_101_9_2817__2.pdf [file pnas_101_9_2817__2.pdf]

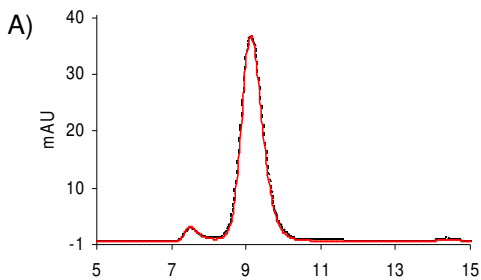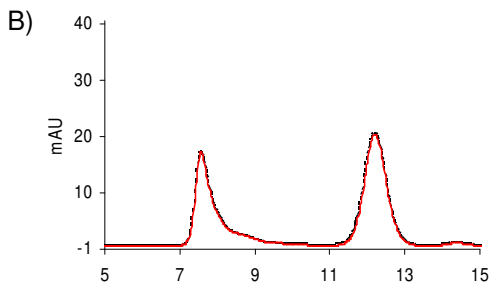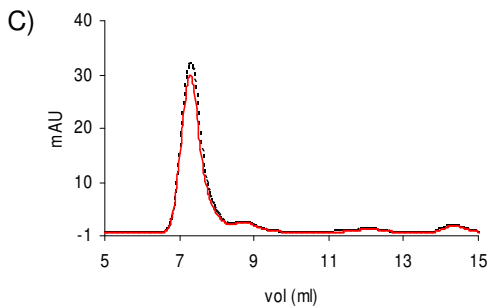

Supplement: pnas_101_9_2817__5.pdf [file pnas_101_9_2817__5.pdf]

A)

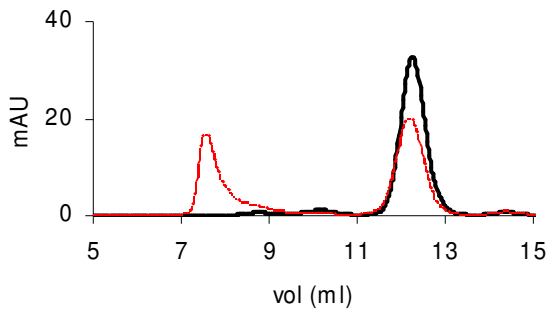

B)

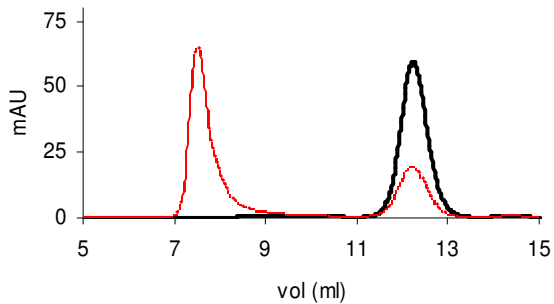

Supplement: pnas_101_9_2817__7.pdf [file pnas_101_9_2817__7.pdf]
